# Supplementary material for: GDF-11, GDF-15, Jag-1, and Leptin in Neuronal-Derived Extracellular Vesicles as an Aging-Related Biomarkers Panel to Identify Individuals at Risk of Alzheimer’s Dementia: A Pilot Study
Source: Research Square preprint supplement (doi:10.21203/rs.3.rs-7680354/v1), 2025-10-08
Supplement: Supplementary file 1 [file 013bf99fa76195457eeed9e9.docx]

**Supplementary Materials**

**GDF-11, GDF-15, Jag-1, and Leptin in Neuronal-Derived Extracellular Vesicles as an Aging-Related Biomarkers Panel to Identify Individuals at Risk of Alzheimer’s Dementia: A Pilot Study**

Simona Lanzillotta1,§, Virginia Boccardi2,§, Barbara Zulli1, Alessandro Napoli3, Gabriele Paolozzi1, Roberta Angelini4, Barbara Ruzicka4, Federica Fratini5, Anna Giulia Guazzarini2,6, Michela Scamosci2, Patrizia Bastiani2, Martina Alunno2, Eric Westman6,7, Fabio Di Domenico1, Marzia Perluigi1, Antonella Tramutola1, Roberta Cecchetti2, Tommaso Mazza3, D. Allan Butterfield8, Patrizia Mecocci2,6*, Eugenio Barone1,*

*1Department of Biochemical Sciences “A. Rossi-Fanelli”, Sapienza University of Rome, Piazzale A. Moro 5, 00185 Rome, Italy;*

2*Division of Gerontology and Geriatrics, Department of Medicine and Surgery, University of Perugia, Santa Maria della Misericordia Hospital, Piazzale Gambuli 1, 06132, Perugia, Italy;*

*3Computational Biology and Bioinformatics UOS, Fondazione Policlinico Universitario Agostino Gemelli IRCCS. Largo Agostino Gemelli, 8, 00168 Roma, Italy;*

*4Institute for Complex Systems National Research Council (ISC-CNR), Sede Sapienza, and Physics Department, Sapienza University, Piazzale Aldo Moro 5, 00185 Rome, Italy;*

*5Department of Neuroscience, Italian National Health Institute (ISS), Viale Regina Elena, 299, 00161 Rome, Italy;*

*6Division of Clinical Geriatrics, Department of Neurobiology, Care Sciences and Society, Karolinska Institute, Stockholm, Sweden;*

*7The Ageing Epidemiology Research Unit, School of Public Health, Imperial College London, London, UK;*

*8Sanders-Brown Center On Aging, Department of Chemistry, University of Kentucky, 249 Chemistry-Physics Building, Lexington, KY, 40506-0055, USA*

*Correspondence to:

Eugenio Barone, Department of Biochemical Sciences “A. Rossi-Fanelli”, Sapienza University of Rome, Piazzale A. Moro 5, 00185 Rome, Italy, [eugenio.barone@uniroma1.it](mailto:eugenio.barone@uniroma1.it), ORCID: 0000-0002-7028-4251

Patrizia Mecocci,Division of Gerontology and Geriatrics, Department of Medicine and Surgery, University of Perugia, Santa Maria della Misericordia Hospital, Piazzale Gambuli 1, 06132, Perugia, Italy,[patrizia.mecocci@unipg.it](mailto:patrizia.mecocci@unipg.it) , ORCID: 0000-0003-0729-5246

§ Simona Lanzillotta and Virginia Boccardi equally contributed to this work

**Supplementary Table 1.** Demographic, clinical, and biochemical characteristics of cognitively normal controls (Ctr) and Alzheimer’s disease (AD) participants.Values are reported as mean ± standard deviation (SD). Units of measurement are indicated for each variable.P-values refer to between-group comparisons performed using unpaired two-tailed t-tests for continuous variables and chi-square test for sex distribution.Bold values indicate statistically significant differences (p < 0.05).ADL, Activities of Daily Living (/6);IADL, Instrumental Activities of Daily Living (/8);MMSE, Mini-Mental State Examination (/30);CLEAR_CREAT, creatinine clearance (ml/min);B12, vitamin B12 (pg/mL);FOLATE, folic acid (ng/mL); ESR, erythrocyte sedimentation rate (mm/h); PCR, C-reactive protein (mg/L).

|  | **Unit** | **Ctr** | SD | **AD** | SD | **p-value** |
| --- | --- | --- | --- | --- | --- | --- |
| **n (M/F)** |  | 14 (8/6) |  | 14 (4/10) |  |  |
| **Age** | years | 75.79 | 10.45 | 81.07 | 3.54 | 0.0921 |
| **ADL** | /6 | 5.38 | 0.65 | 4 | 1.29 | **0.0029** |
| **IADL** | /8 | 5.46 | 2.15 | 2.77 | 1.92 | **0.0026** |
| **MMSE** | /30 | 26.57 | 3.76 | 17.42 | 4.64 | **<0.0001** |
| **GLYCEMIA** | mg/dL | 98.54 | 18.95 | 98.92 | 19.65 | 0.9614 |
| **AZOTEMIA** | mg/dL | 56.5 | 13.45 | 79 | 110.86 | 0.4813 |
| **CREATININE** | mg/dL | 0.9 | 0.2 | 1.04 | 0.29 | 0.1710 |
| **CLEAR_CREAT** | ml/min | 65.67 | 22.28 | 51.08 | 11.25 | 0.0596 |
| **URIC_ACID** | mg/dL | 5.35 | 1.2 | 5.87 | 1.38 | 0.3867 |
| **CHOLESTEROL_TOTAL** | mg/dL | 186.33 | 40.5 | 179.77 | 41.03 | 0.6912 |
| **CHOLESTEROL_HDL** | mg/dL | 58.82 | 8.58 | 55.92 | 12.6 | 0.5126 |
| **CHOLESTEROL_LDL** | mg/dL | 110.62 | 38.73 | 100.73 | 34.75 | 0.5280 |
| **TRIGLYCERIDES** | mg/dL | 94.67 | 32.24 | 94.85 | 25.04 | 0.9878 |
| **B12** | pg/mL | 311.85 | 188.65 | 208.85 | 70.01 | 0.0845 |
| **FOLATE** | ng/mL | 6.43 | 3.95 | 8.01 | 6.01 | 0.4380 |
| **ESR** | mm/h | 9.5 | 8.82 | 31.08 | 24 | **0.016** |
| **CRP** | mg/L | 0.16 | 0.11 | 1.52 | 2.28 | 0.0525 |

**Supplementary Table 2.** Autopsy case demographics. Abbreviations: MMSE, minimental state examination; PMI, post-mortem interval.

| **Group** | **Age** | **Sex** | **Race** | **APOE** | **MMSE** | **PMI** |
| --- | --- | --- | --- | --- | --- | --- |
| Control | 85 | F | White | 3/3 | 30 | 2.12 |
| Control | 92 | F | White | 3/3 | 24 | 1.33 |
| Control | 87 | M | White | 3/3 | 29 | 2.42 |
| Control | 92 | M | White | 3/3 | 30 | 3.75 |
| Control | 88 | M | White | 3/3 | 30 | 2.08 |
| Control | 84 | F | White | 3/3 | 30 | 2.42 |
| Control | 96 | F | White | 3/3 | 30 | 2.03 |
| Control | 94 | M | White | 3/3 | 29 | 15 |
| PCAD | 80 | M | White | 3/4 | 27 | 3 |
| PCAD | 94 | F | White | 3/3 | 30 | 2.63 |
| PCAD | 87 | F | White | 3/3 | 30 | 2.33 |
| PCAD | 84 | F | White | NA | 29 | 3.25 |
| PCAD | 92 | F | White | 3/2 | 30 | 3.25 |
| PCAD | 87 | F | White | 3/4 | 30 | 2.42 |
| PCAD | 90 | M | White | 3/3 | 28 | 2 |
| PCAD | 77 | M | White | 3/4 | 30 | 2.67 |
| MCI | 87 | M | White | 3/3 | 27 | 2.75 |
| MCI | 96 | F | White | 3/3 | 27 | 2.42 |
| MCI | 91 | M | White | 3/2 | 28 | 2.33 |
| MCI | 84 | M | White | 3/4 | 24 | 3.5 |
| MCI | 96 | F | White | 3/4 | 28 | 2.25 |
| MCI | 84 | F | White | 3/3 | 26 | 2.5 |
| AD | 92 | M | White | 3/4 | 24 | 1.67 |
| AD | 86 | M | White | 3/4 | 9 | 3.25 |
| AD | 87 | F | White | 3/3 | 0 | 2.67 |
| AD | 89 | F | White | 4/2 | 24 | 3.17 |
| AD | 95 | F | White | 3/3 | 17 | 2.1 |
| AD | 90 | M | White | 3/4 | 12 | 3.25 |
| AD | 93 | F | White | 3/3 | 0 | 2.75 |
| AD | 83 | M | White | NA | 25 | 2.77 |

**
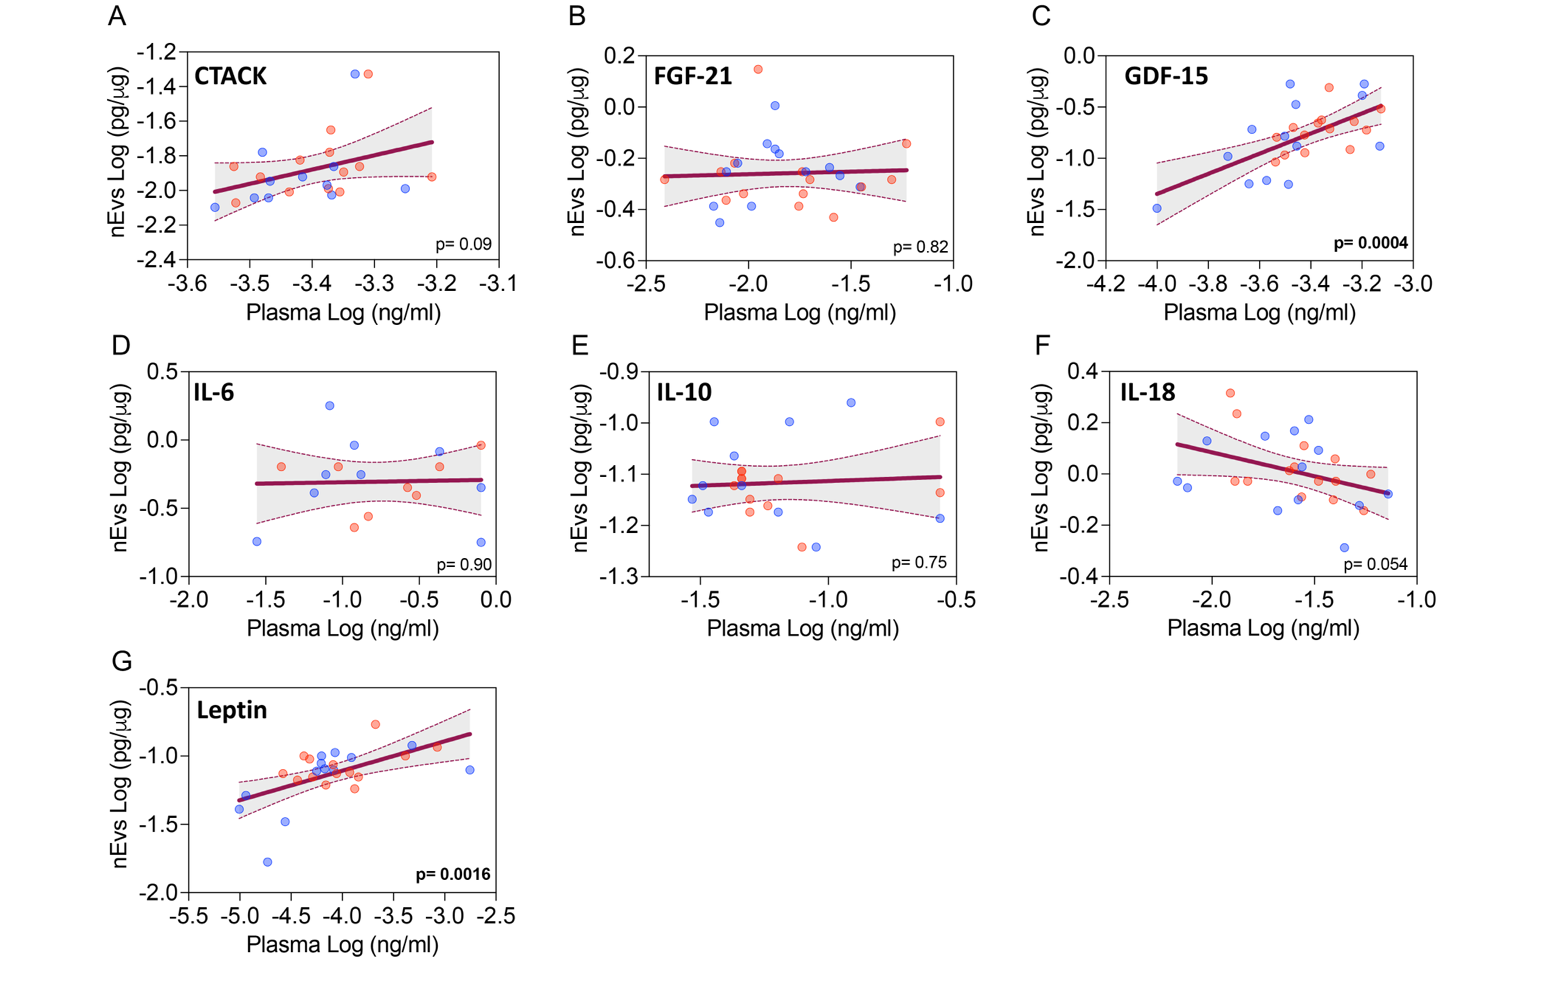
**

**Supplementary Figure 1. Plasma biomarkers levels predict nEVs biomarkers levels for selected markers.** Linear regression analyses evaluating the association between plasma and nEVs concentrations across the full cohort. Significant associations (p < 0.05) are reported for GDF-15 and Leptin.

**
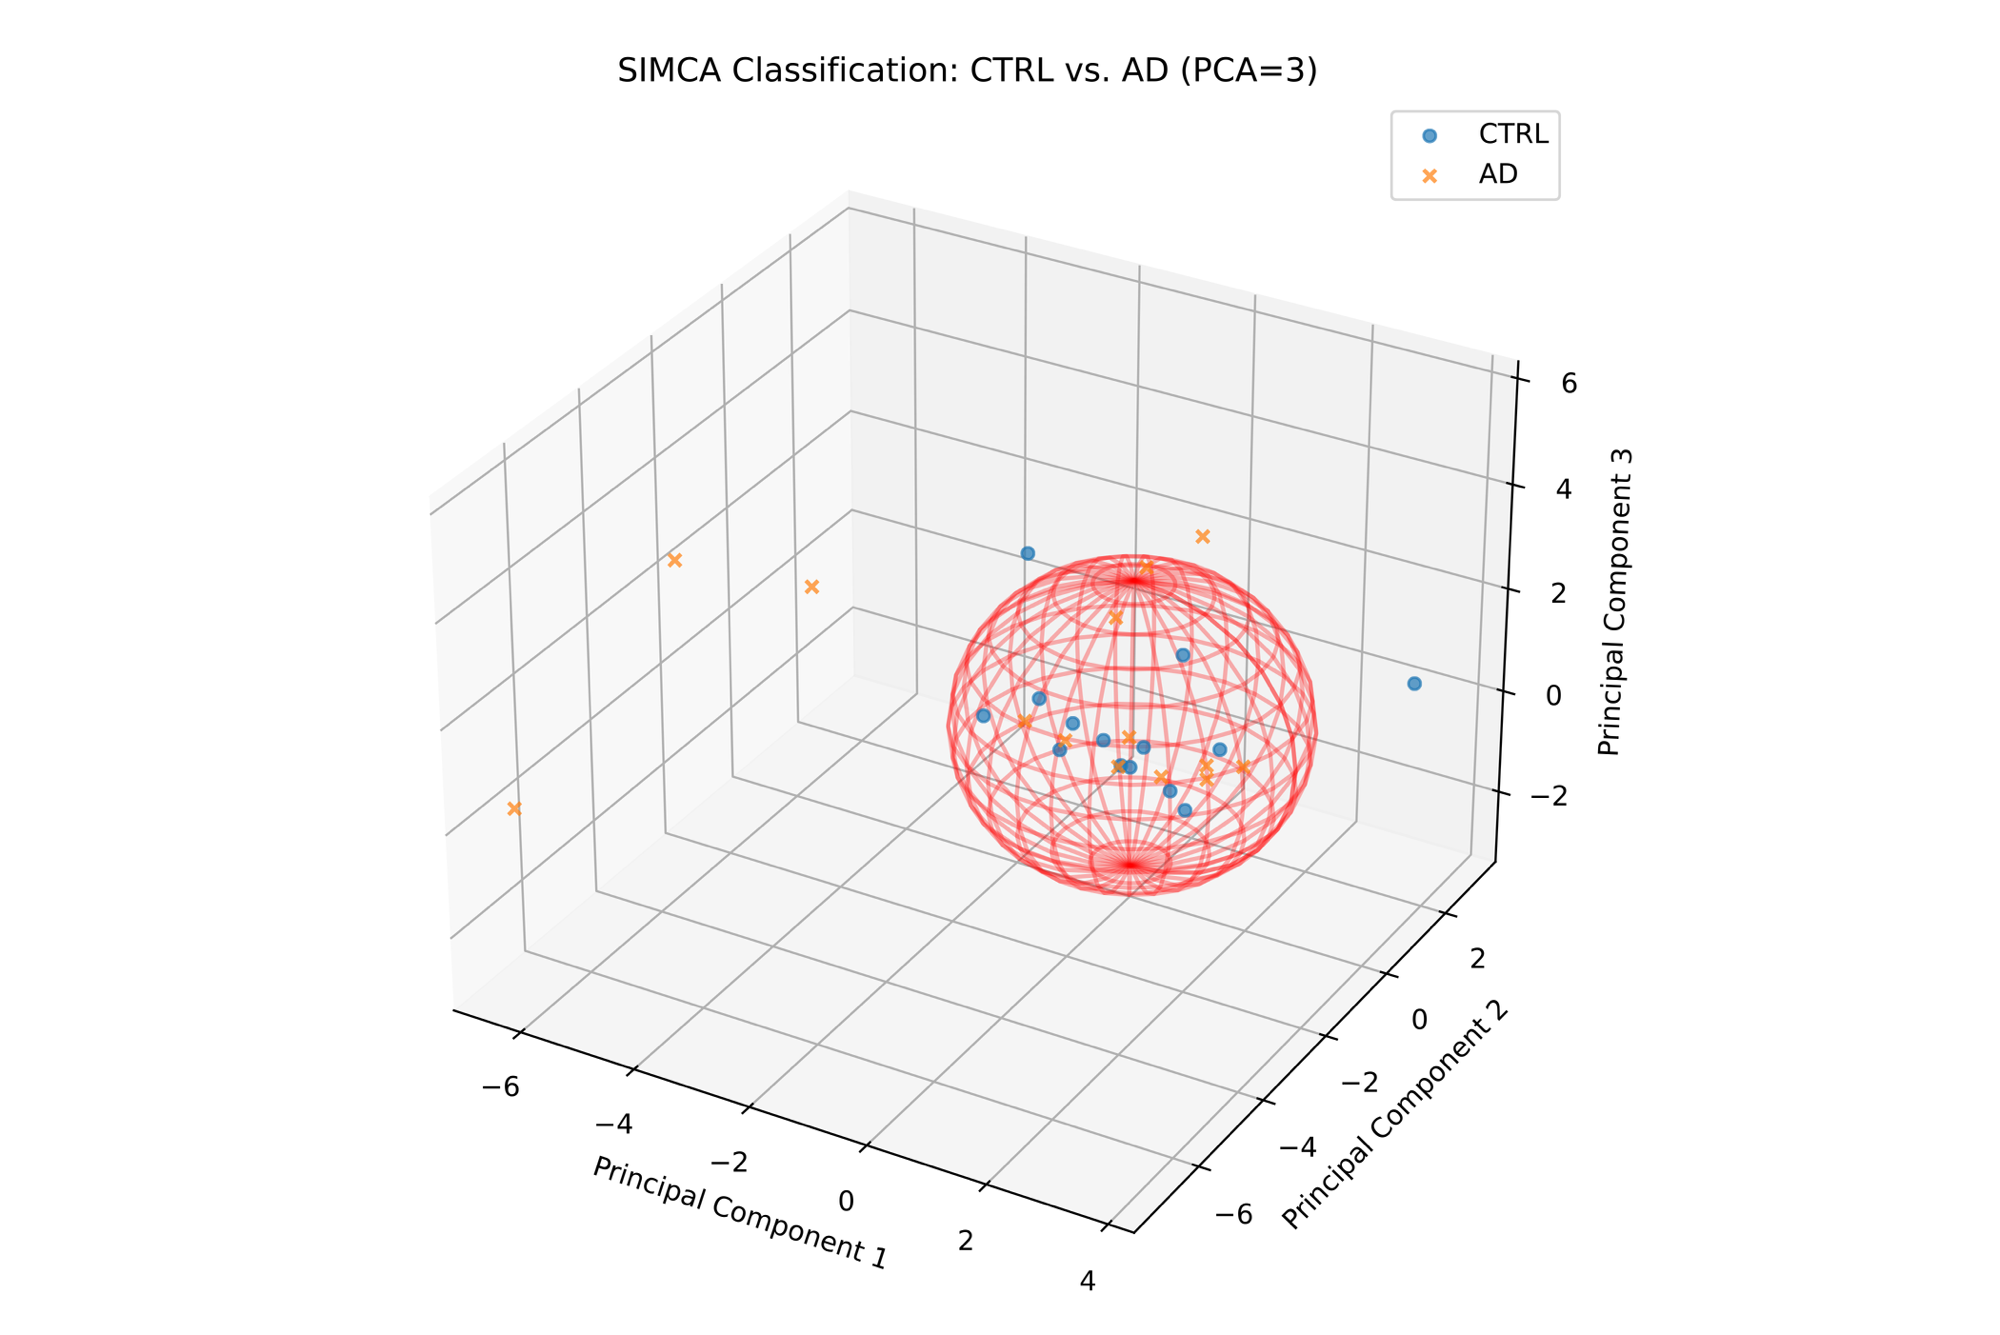
**

**Supplementary Figure 2.** **3D SIMCA classification plot based on nEV-derived biomarkers**. The plot shows the distribution of samples in PCA space (PC1–PC3), with AD subjects indicated by crosses and control subjects by dots. The red ellipsoid represents the confidence region based on the control group. AD samples falling outside this region were classified as deviating from the control-based distribution.


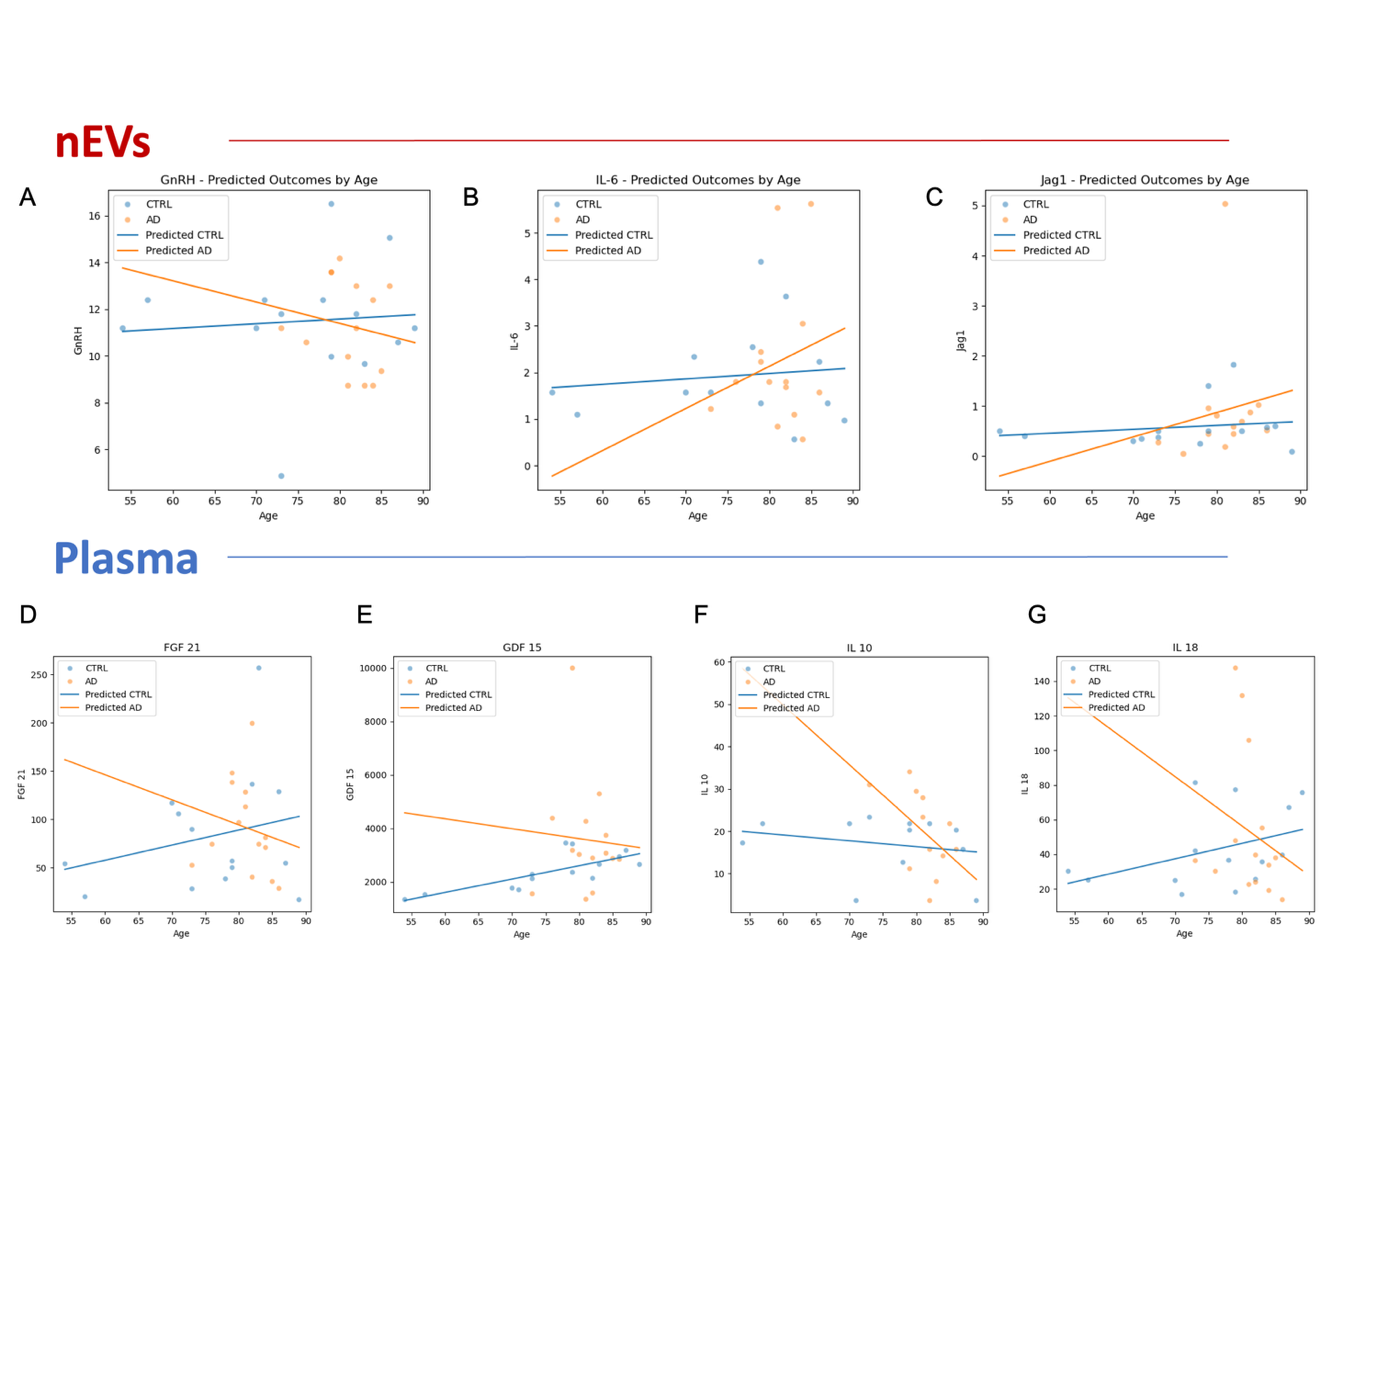


**Supplementary Figure 3. Age-by-diagnosis interaction effects on biomarkers levels in nEVs and plasma.** Linear mixed model analyses evaluating the interaction between age and diagnosis (AD vs control) on biomarker levels measured in neuronal extracellular vesicles (nEVs) and plasma. In nEVs (A–C), age-related trajectories for GnRH, IL-6, and Jag-1 differed between AD and control subjects, indicating a modulation of group differences by age. In plasma (D–G), FGF-21, GDF-15, IL-10, and IL-18 also displayed diagnosis-dependent age effects

**
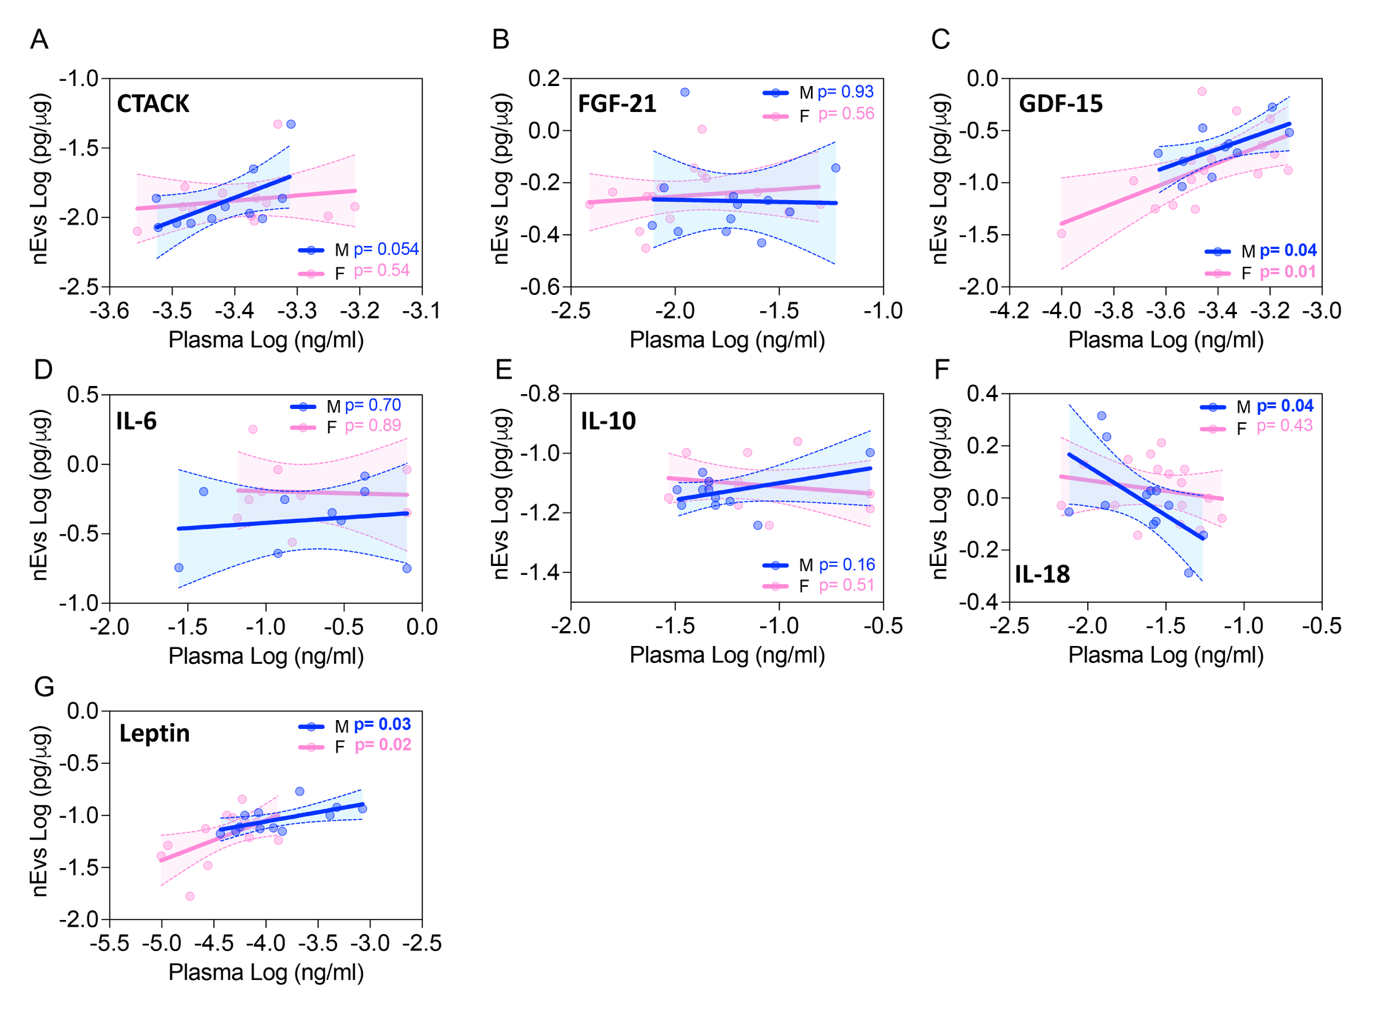
**

**Supplementary Figure 4. Sex-stratified correlations between plasma and nEVs biomarkers levels.** Linear regression analyses exploring correlations between plasma and nEVs levels by sex. P-values < 0.05 are reported in bold.

**
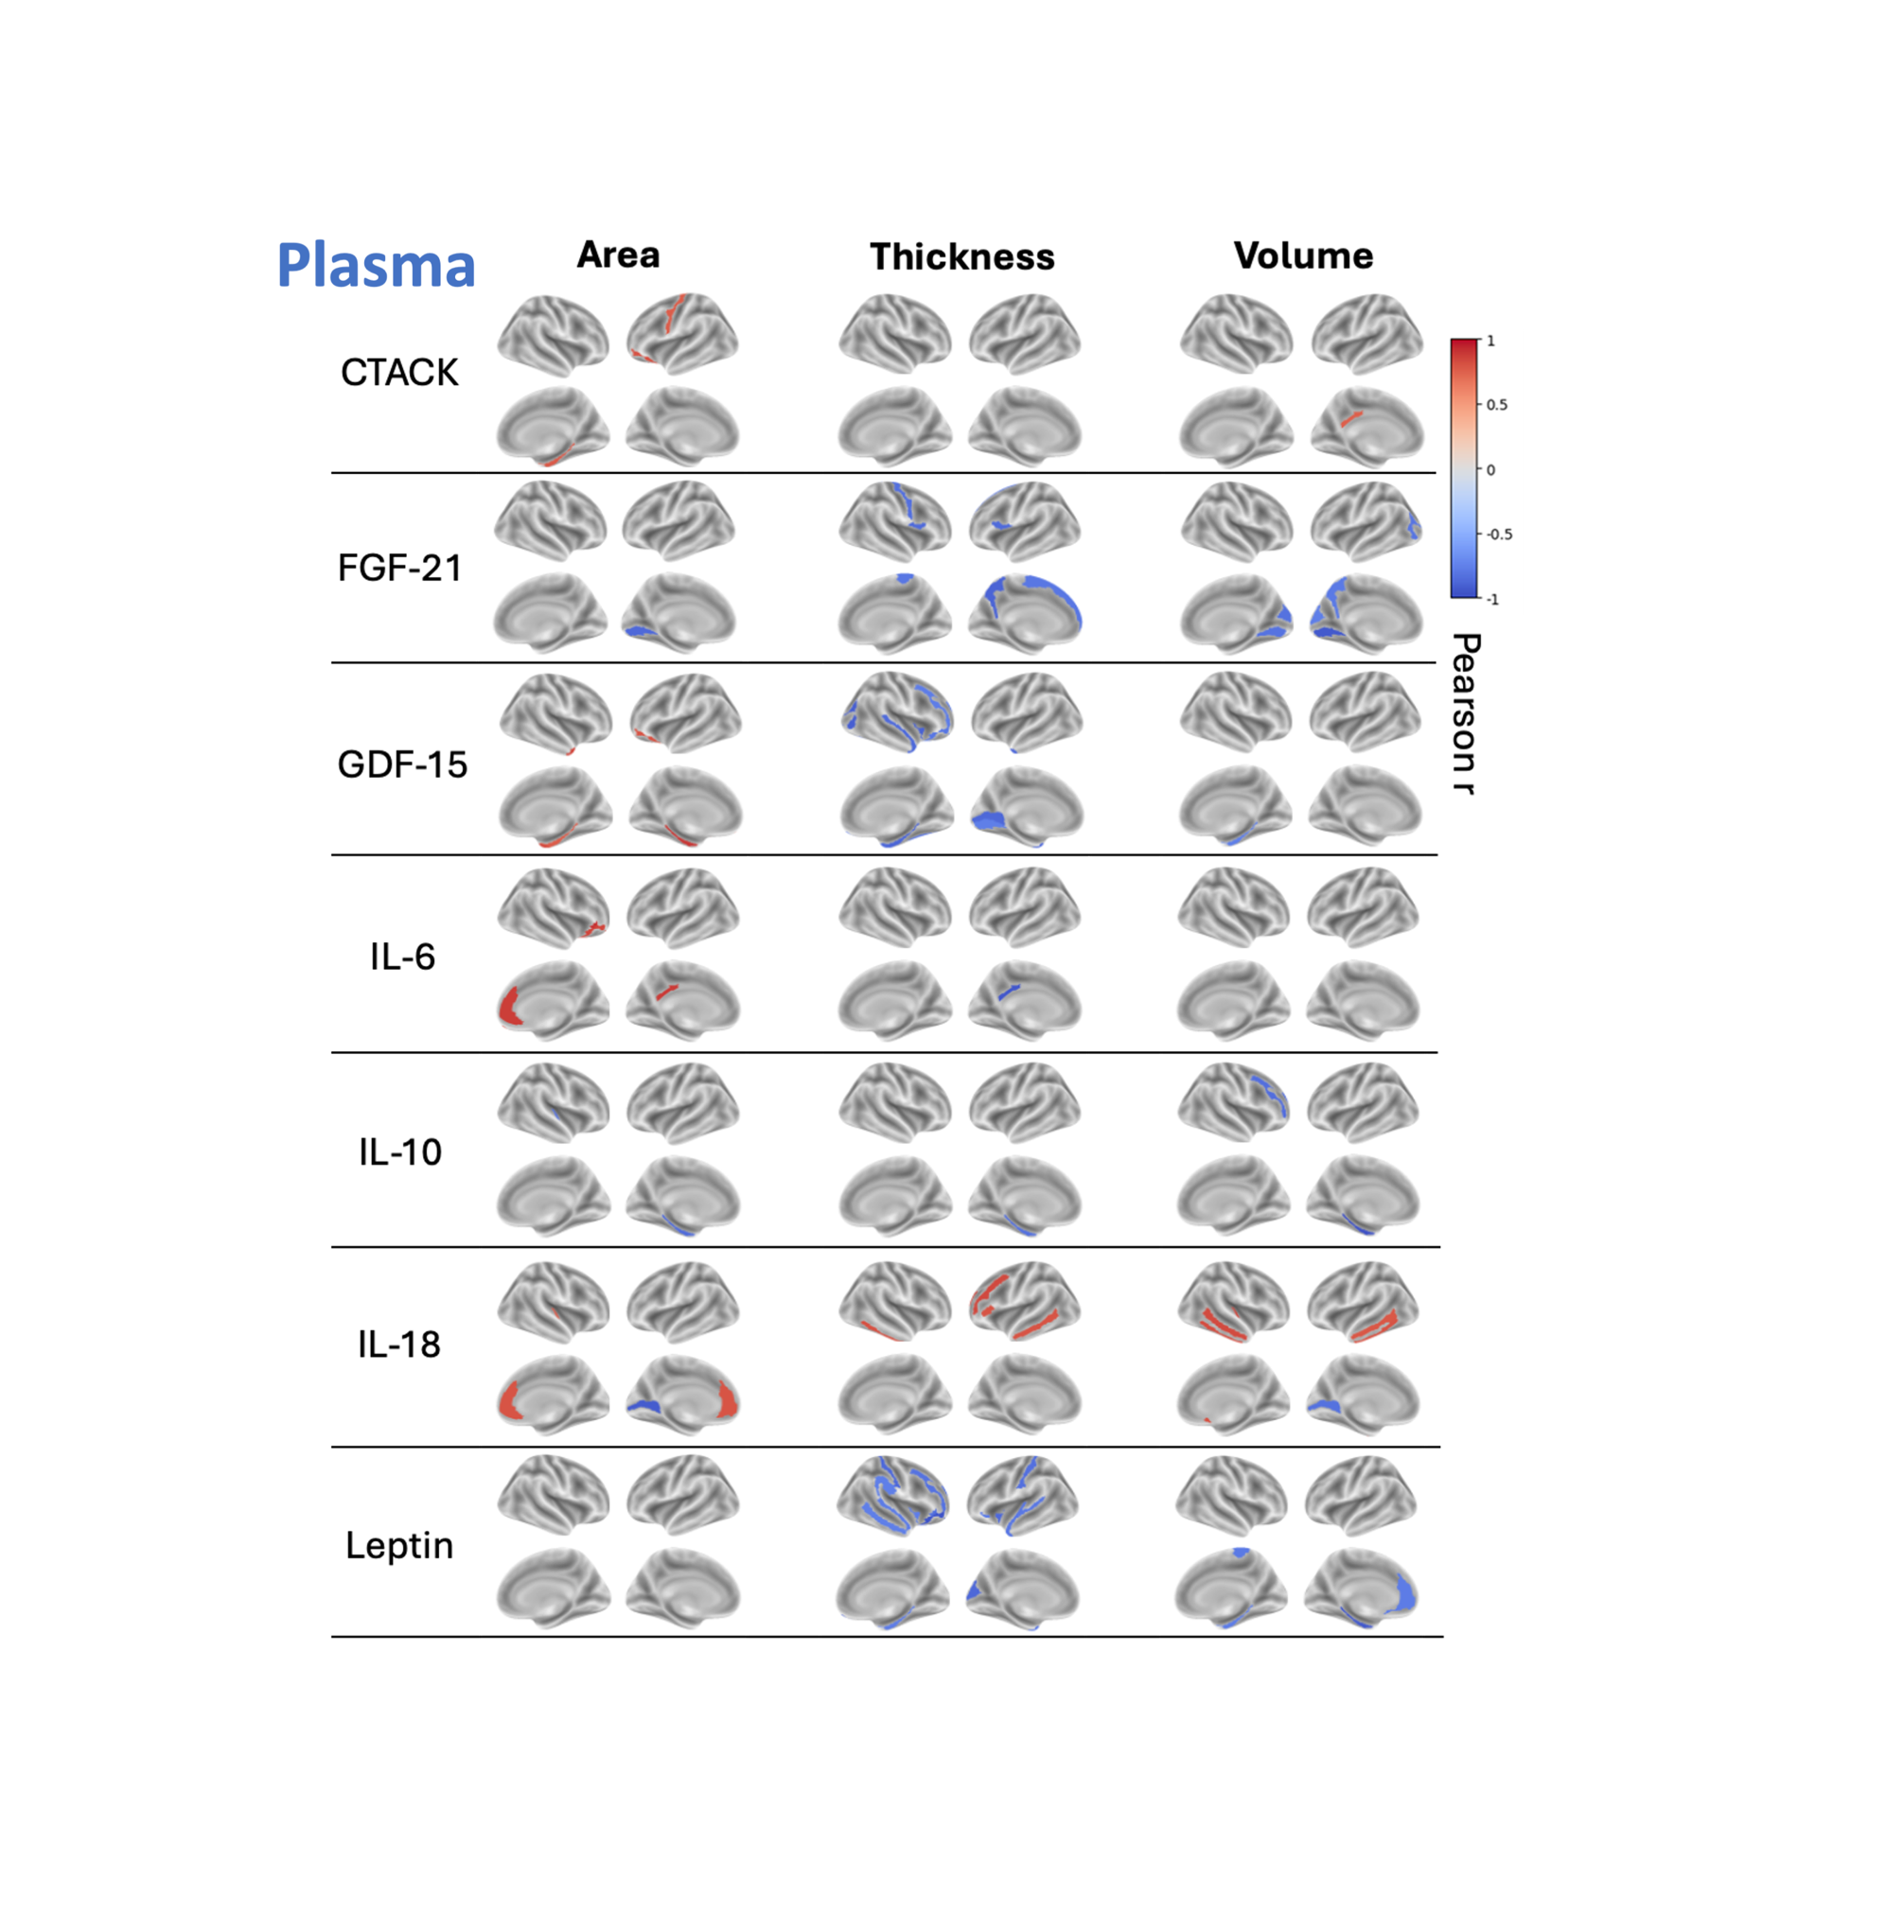
**

**Supplementary Figure 5. Brain maps showing significant Pearson correlations between plasma biomarkers levels and MRI-derived structural measures, including cortical thickness, surface area, and regional volumes.** Regions are color-coded based on the direction and strength of the correlation (red: positive; blue: negative), and are displayed on lateral and medial views of both hemispheres. Only regions showing statistically significant associations (p < 0.05) are visualized. Anatomical labeling is based on the Desikan-Killiany atlas (FreeSurfer v6.0). Biomarkers included in this figure were selected based on their significant associations with MRI measures as reported in Supplementary Table 3

**
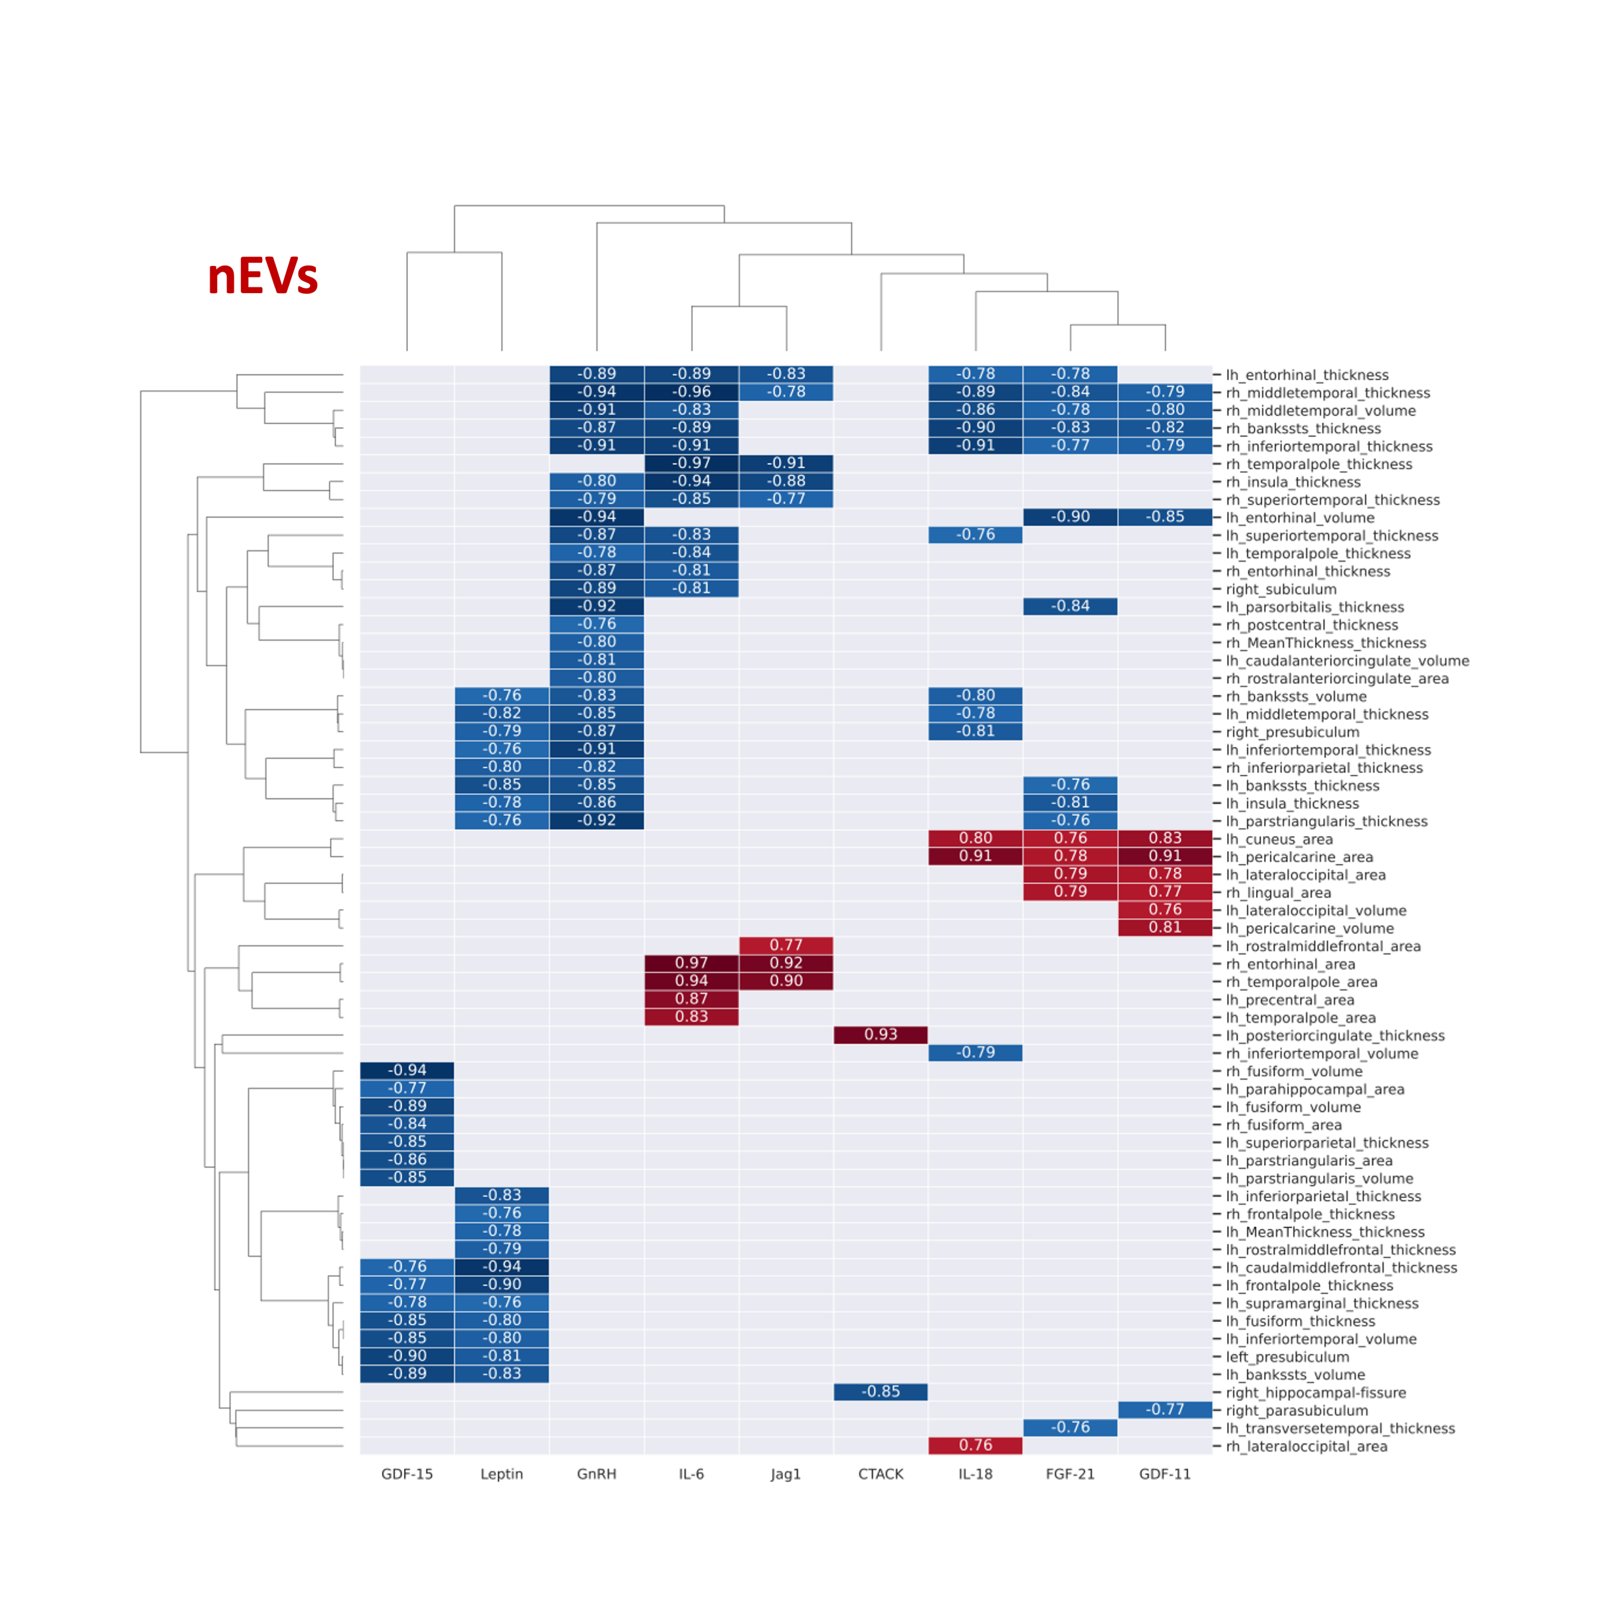
**

**Supplementary Figure 6.** **Clustered heatmaps of significant Pearson correlations between neuroimaging measures and molecular biomarkers measured in neural-derived extracellular vesicles (nEVs)**. Neuroimaging features include cortical thickness and subcortical volumes obtained using FreeSurfer v6.0 (Desikan-Killiany atlas). Agglomerative hierarchical clustering was applied to brain regions using Euclidean distance and average linkage to identify spatially coherent clusters. Heatmaps were generated using the clustermap function in the Seaborn Python library. Dendrograms are displayed along both axes, and annotations are shown only for statistically significant correlations (p < 0.05). The color scale indicates correlation strength and direction (red: positive; blue: negative). Biomarkers include CTACK, GDF-11, GDF-15, GnRH, IL-6, IL-10, IL-18, and Jag-1. For a full reference look at Supplementary table 3.


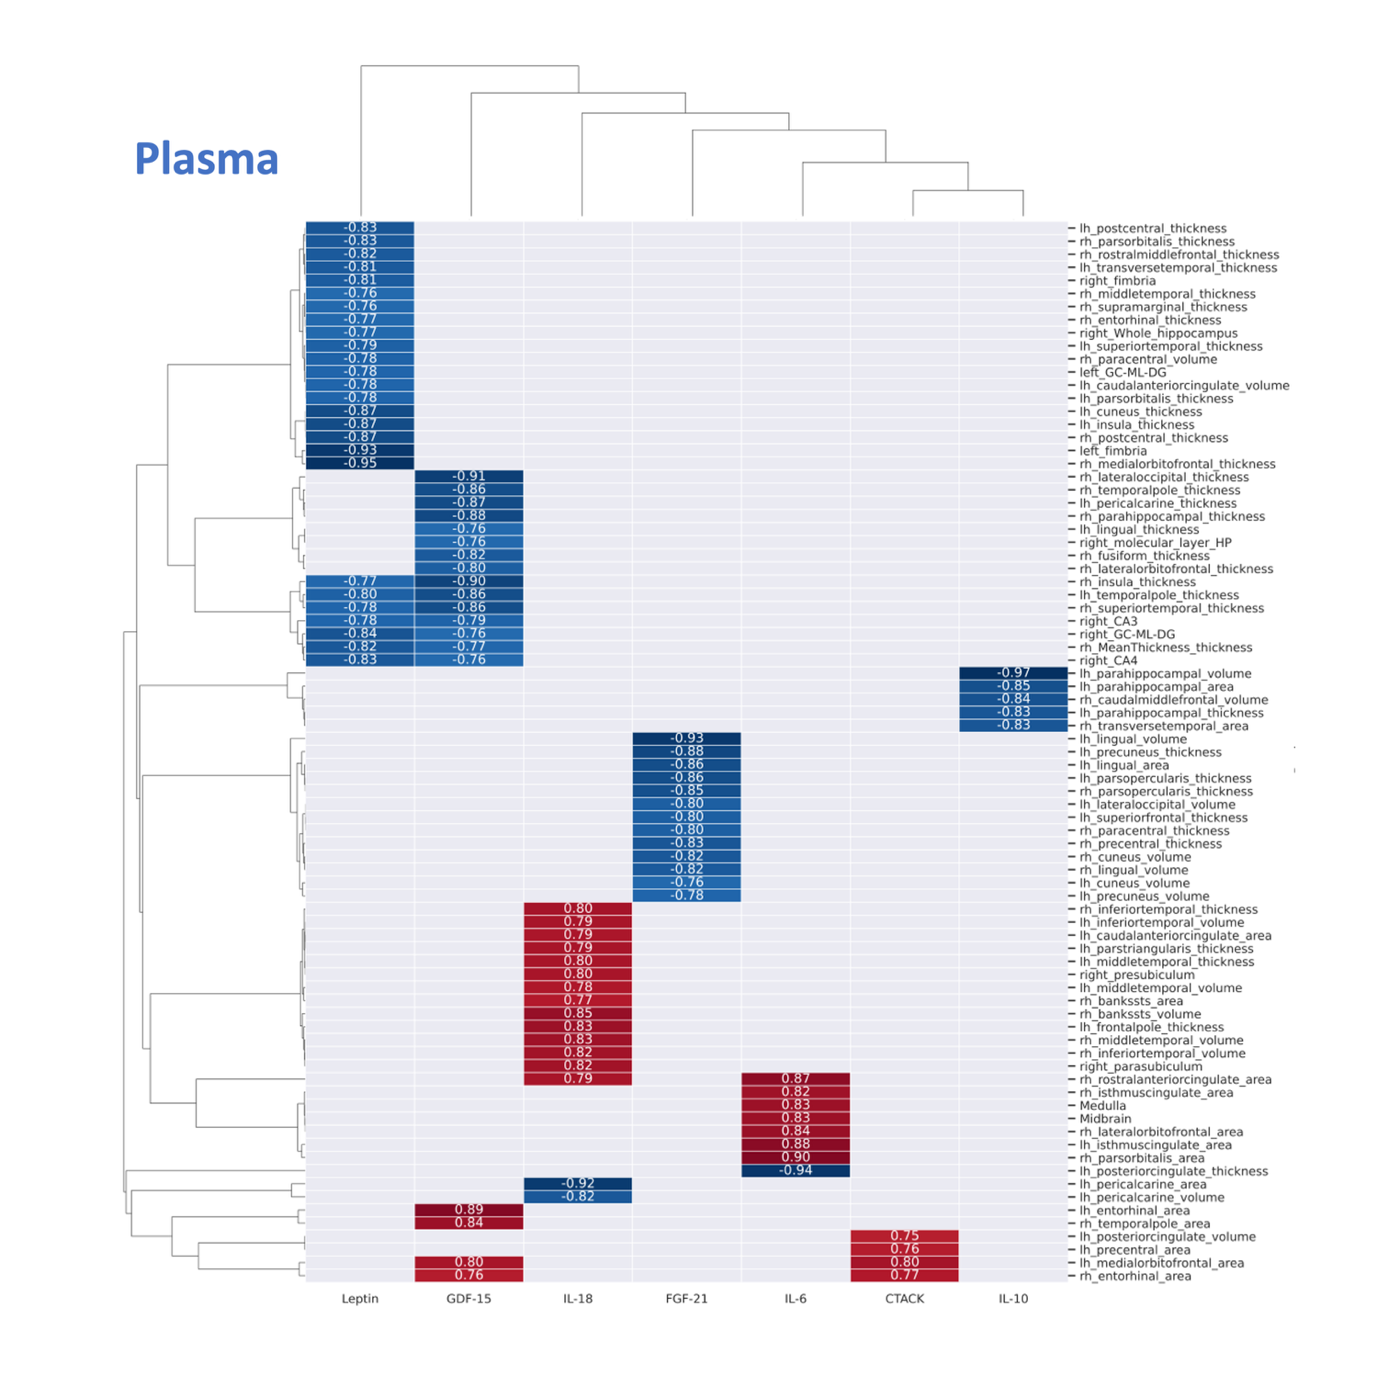


**Supplementary Figure 7.** **Clustered heatmaps of significant Pearson correlations between neuroimaging measures and molecular biomarkers measured in plasma.**Clustered heatmaps of significant Pearson correlations between neuroimaging measures and molecular biomarkers measured in plasma. Neuroimaging features were derived from T1-weighted MRI using FreeSurfer v6.0 and the Desikan-Killiany atlas. Agglomerative hierarchical clustering (Euclidean distance, average linkage) was applied to brain regions, and heatmaps were generated with Seaborn’s clustermap function. Dendrograms illustrate similarity among regions. The color scale ranges from red (positive) to blue (negative) correlations. Only statistically significant associations (p < 0.05) are displayed. Plasma biomarkers include CTACK, GDF-15, IL-6, IL-10, and IL-18. For a full reference look at Supplementary table 3


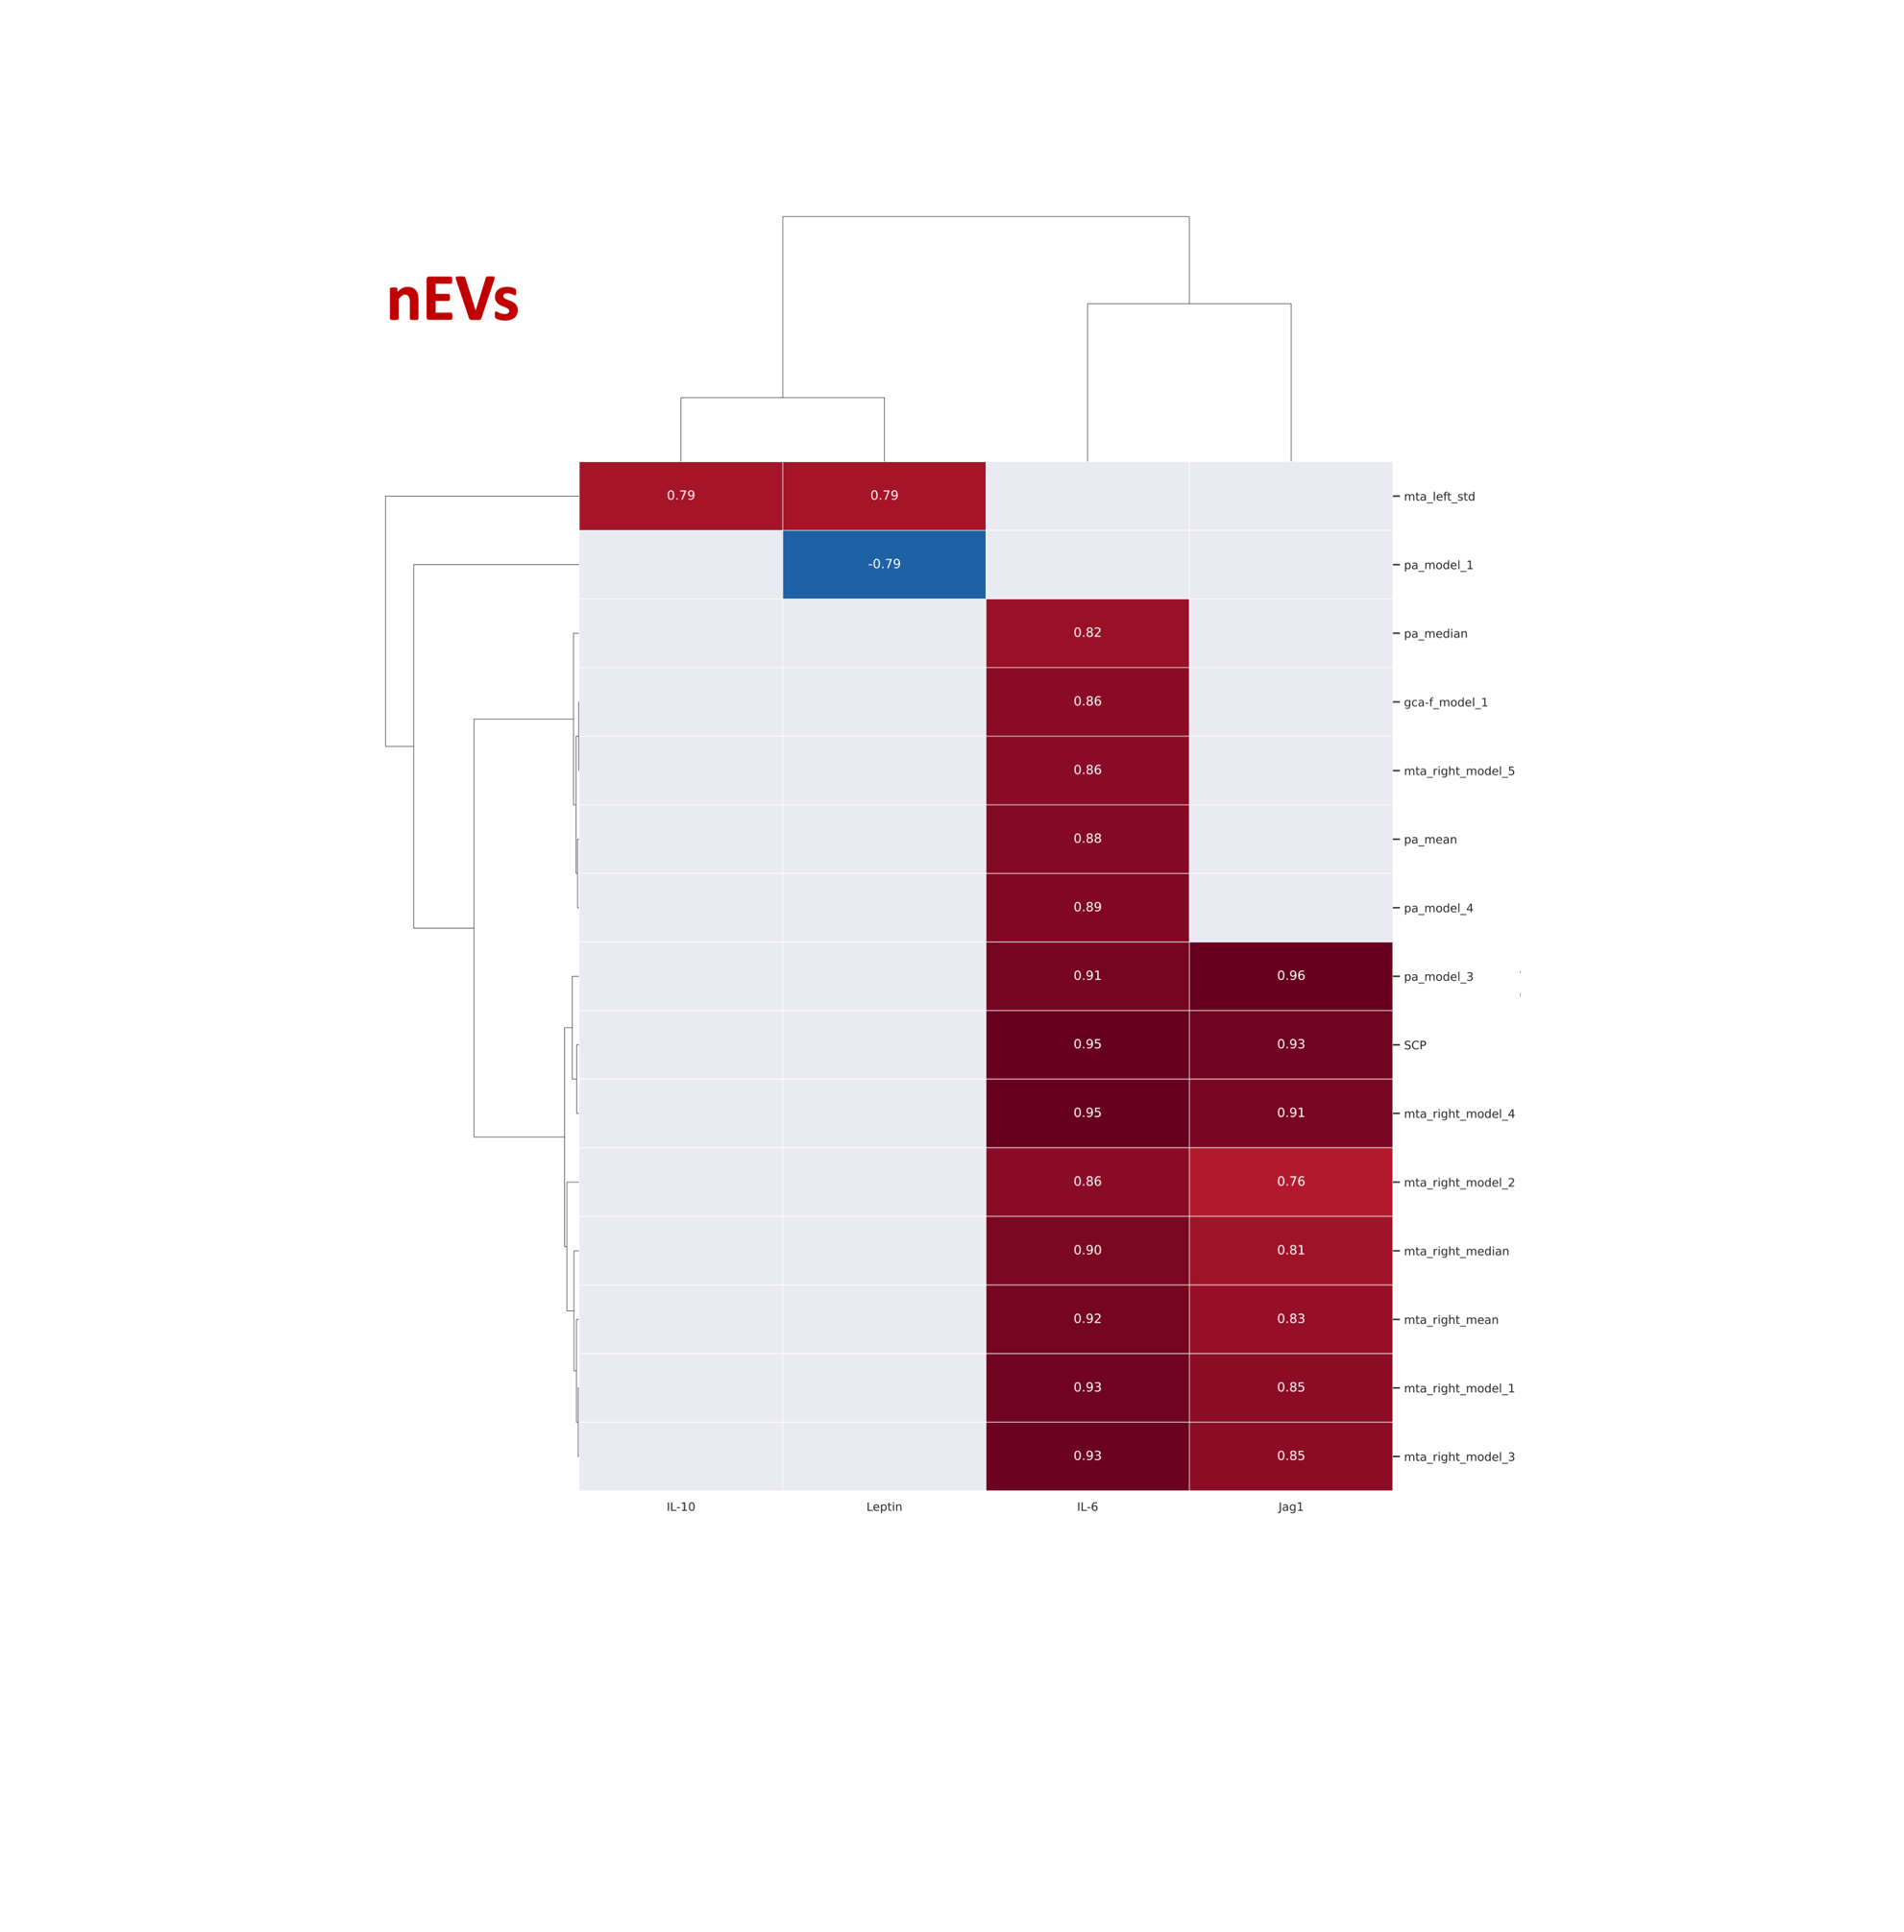


**Supplementary Figure 8.** **Clustered heatmaps of significant Pearson correlations between composite neuroimaging scores (e.g., MTA, PA, SCP models) and molecular biomarkers measured in neuronal-derived extracellular vesicles (nEVs).** The clustering of MRI-derived regions was performed using agglomerative hierarchical clustering (average linkage, Euclidean distance) and visualized with Seaborn’s clustermap. Only statistically significant correlations (p < 0.05) are shown, with red and blue indicating positive and negative associations, respectively. Bounding boxes highlight major spatial clusters. MTA: Medial Temporal Atrophy scores; PA: Posterior Atrophy scores; and SCP: Superficial Cortical Atrophy Pattern score. For a full reference look at Supplementary table 3


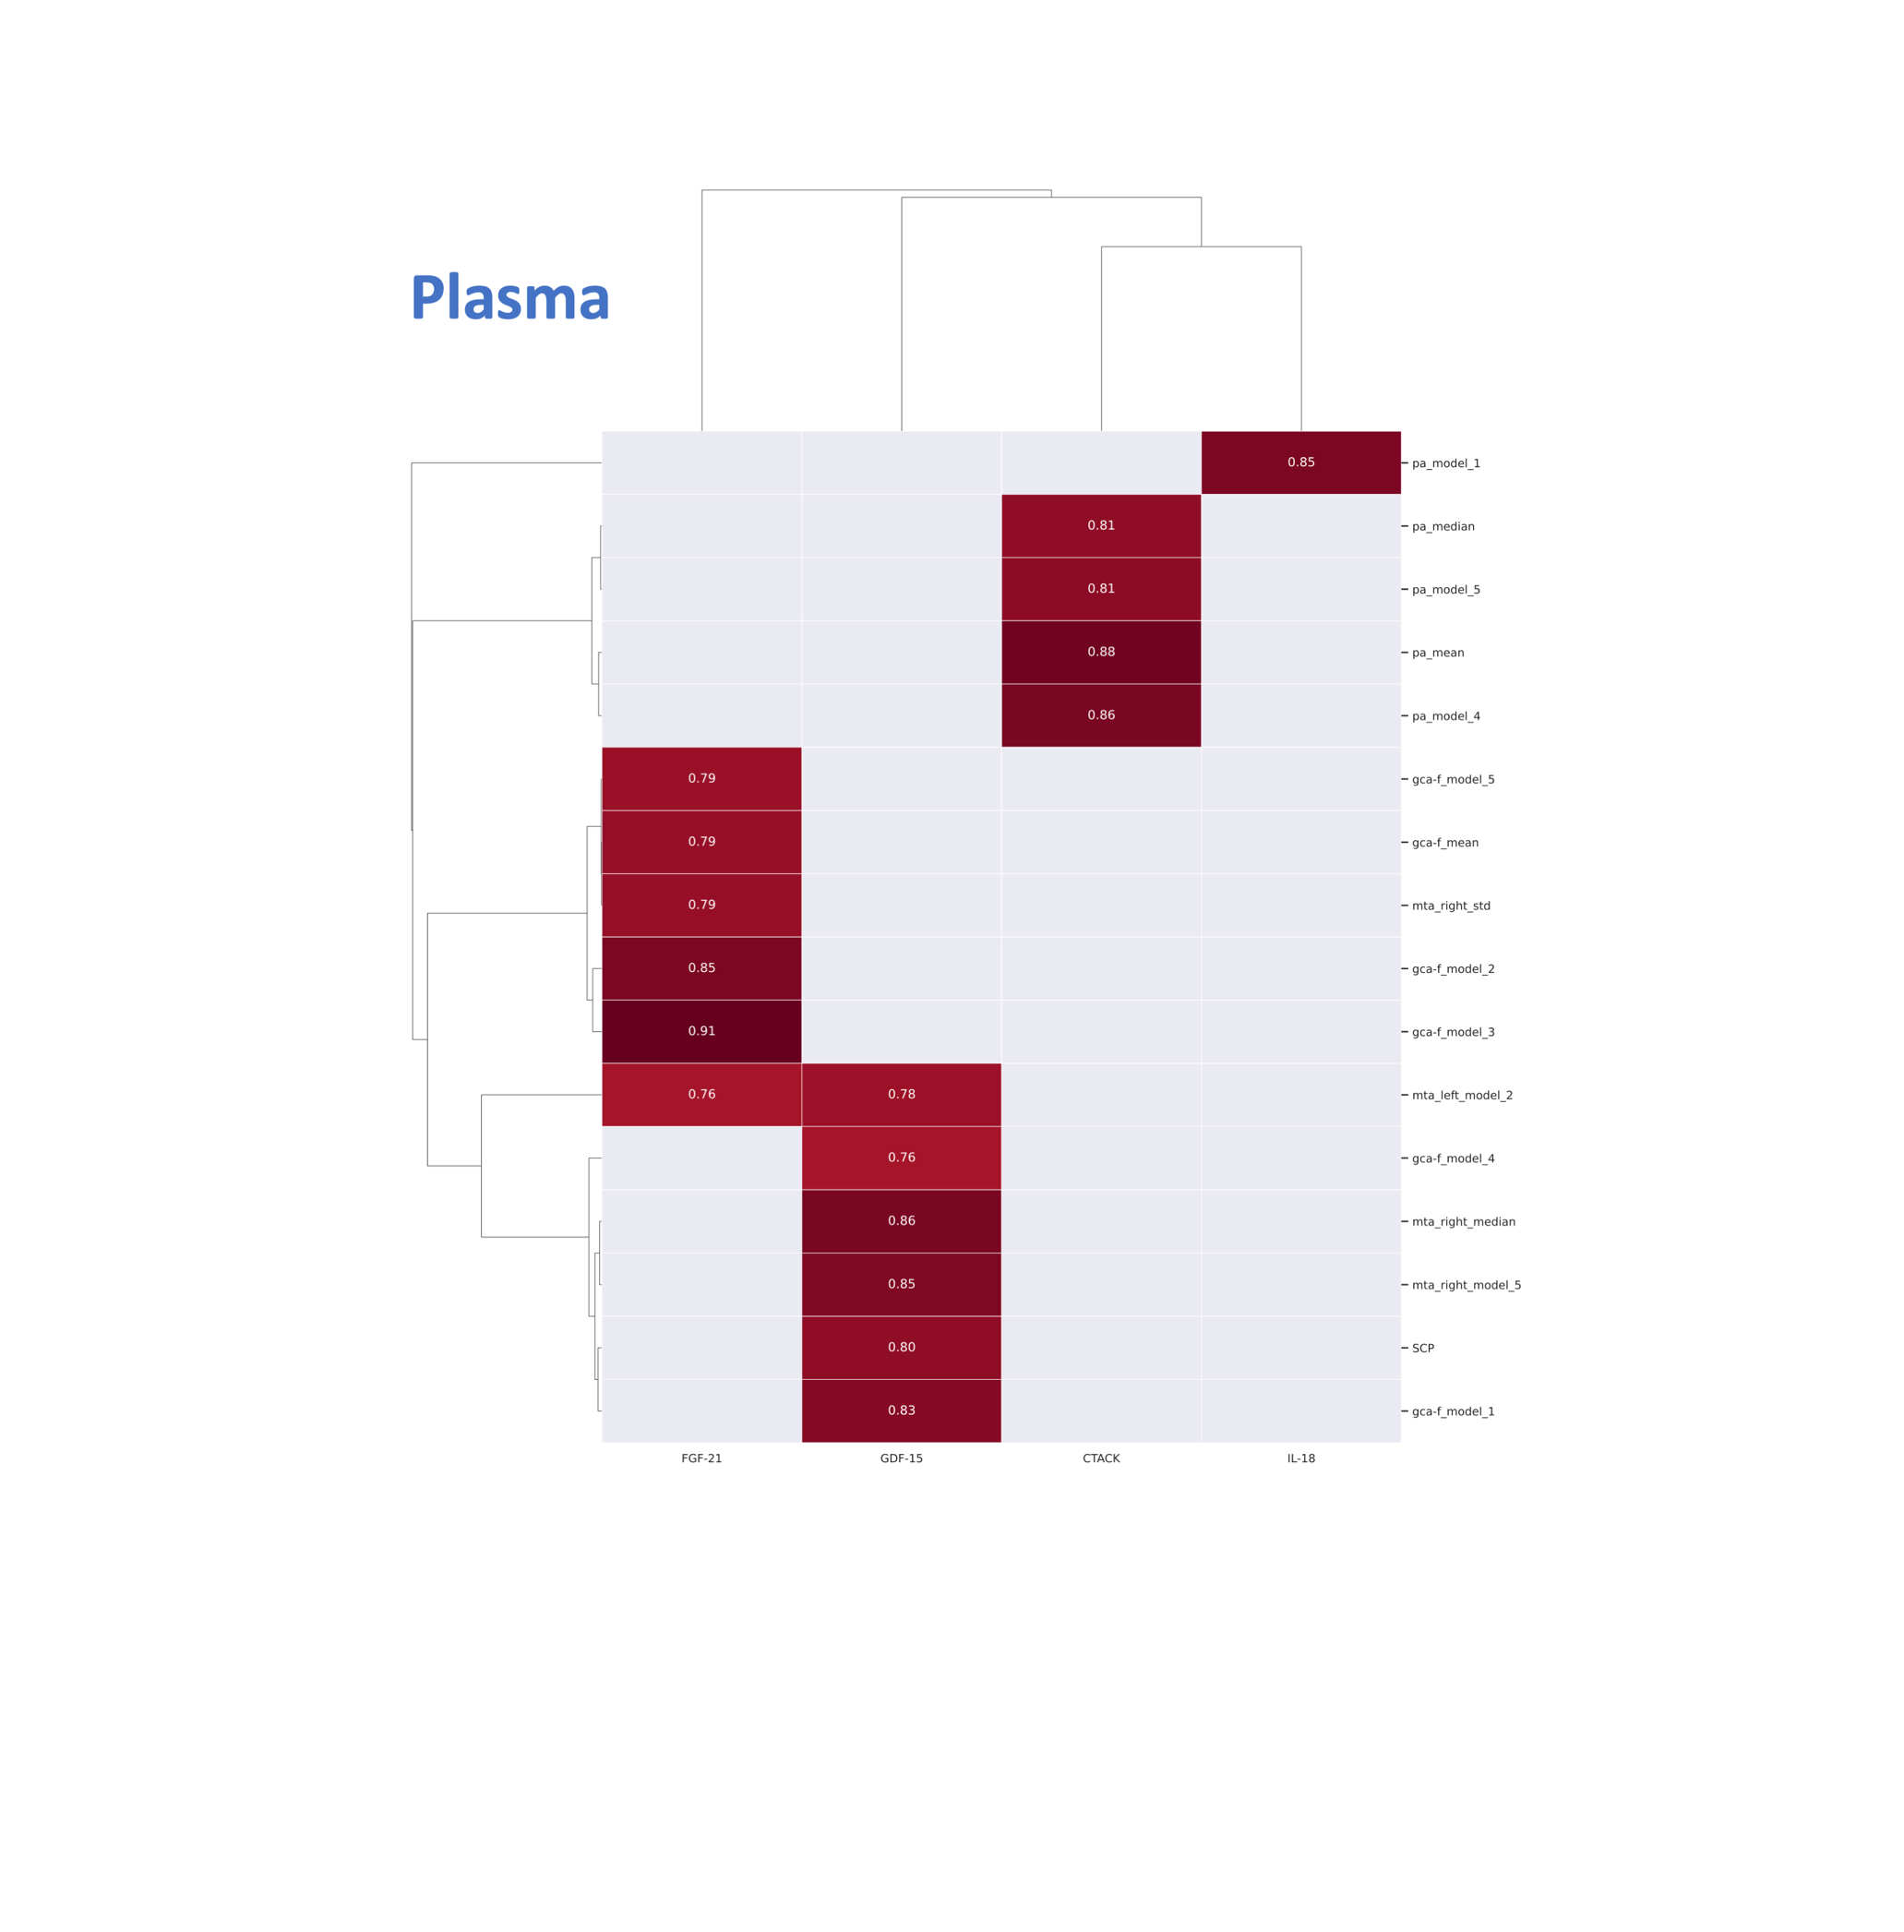


**Supplementary Figure 9.** Clustered heatmaps of significant Pearson correlations between composite neuroimaging scores (e.g., MTA, PA, SCP models) and plasma-derived biomarkers. Agglomerative hierarchical clustering (average linkage, Euclidean distance) was applied to MRI-derived brain regions. Heatmaps were generated using Seaborn’s clustermap, and only significant correlations (p < 0.05) are displayed. The color scale indicates direction and magnitude (red: positive; blue: negative), with dendrograms indicating spatial similarity among regions. MTA: Medial Temporal Atrophy scores; PA: Posterior Atrophy scores; and SCP: Superficial Cortical Atrophy Pattern score. For a full reference look at Supplementary table 3

**Supplementary Table 3. Correlations between biomarkers levels in nEVs and plasma and MRI-derived brain structural measures.** Significant Pearson correlations between selected aging-related biomarkers measured in nEVs or plasma and brain regional volumes, cortical thickness, and surface area metrics derived from T1-weighted MRI scans (FreeSurfer v6.0) or visual rating models (MTA, PA, SCP). Biomarkers were significantly associated with multiple regions known to be affected in aging and Alzheimer’s disease. Abbreviations follow FreeSurfer nomenclature; lh_ and rh_ indicate left and right hemisphere. _thickness, _volume, and _area refer to the respective MRI-derived measurement; MTA: Medial Temporal Atrophy scores; PA: Posterior Atrophy scores; and SCP: Superficial Cortical Atrophy Pattern score.

|  | nEVs measures vs RMN measures | | |
| --- | --- | --- | --- |
|  |  | **Pearson r** | **P value** |
| CTACK | Ih_posteriorcingulate_thickness | 0,9309 | ** 0,007 |
| right_hippocampal-fissure | -0,8468 | * 0,0334 |
|  |  |  |  |
| FGF-21 | lh_bankssts_thickness | -0,7552 | * 0,0496 |
| lh_cuneus_area | 0,7621 | * 0,0464 |
| lh_entorhinal_thickness | -0,7803 | * 0,0384 |
| lh_entorhinal_volume | -0,898 | ** 0,006 |
| lh_insula_thickness | -0,8149 | * 0,0256 |
| lh_lateraloccipital_area | 0,7946 | * 0,0328 |
| lh_parsorbitalis_thickness | -0,8384 | * 0,0184 |
| lh_parstriangularis_thickness | -0,7639 | * 0,0456 |
| lh_pericalcarine_area | 0,7806 | * 0,0383 |
| lh_transversetemporal_thickness | -0,7617 | * 0,0466 |
| rh_bankssts_thickness | -0,8329 | * 0,02 |
| rh_inferiortemporal_thickness | -0,7671 | * 0,0441 |
| rh_lingual_area | 0,786 | * 0,0361 |
| rh_middletemporal_thickness | -0,8364 | * 0,019 |
| rh_middletemporal_volume | -0,7801 | * 0,0385 |
|  |  |  |  |
| GDF-11 | lh_cuneus_area | 0,8344 | * 0,0196 |
| lh_entorhinal_volume | -0,8522 | * 0,0149 |
| lh_lateraloccipital_area | 0,7823 | * 0,0376 |
| lh_lateraloccipital_volume | 0,7631 | * 0,046 |
| lh_pericalcarine_area | 0,9136 | ** 0,004 |
| lh_pericalcarine_volume | 0,8073 | * 0,0281 |
| rh_bankssts_thickness | -0,8236 | * 0,0228 |
| rh_inferiortemporal_thickness | -0,7896 | * 0,0347 |
| rh_lingual_area | 0,7702 | * 0,0428 |
| rh_middletemporal_thickness | -0,7853 | * 0,0364 |
| rh_middletemporal_volume | -0,7985 | * 0,0313 |
| right_parasubiculum | -0,769 | * 0,0433 |
|  |  |  |  |
| GDF-15 | left_presubiculum | -0,8965 | ** 0,0063 |
| lh_bankssts_volume | -0,8888 | ** 0,0075 |
| lh_caudalmiddlefrontal_thickness | -0,7643 | * 0,0454 |
| lh_frontalpole_thickness | -0,7695 | * 0,0431 |
| lh_fusiform_thickness | -0,8496 | * 0,0155 |
| lh_fusiform_volume | -0,8875 | ** 0,0077 |
| lh_inferiortemporal_volume | -0,8547 | * 0,0143 |
| lh_parahippocampal_area | -0,7697 | * 0,043 |
| lh_parstriangularis_area | -0,8561 | * 0,0139 |
| lh_parstriangularis_volume | -0,8535 | * 0,0145 |
| lh_superiorparietal_thickness | -0,85 | * 0,0154 |
| lh_supramarginal_thickness | -0,7775 | * 0,0396 |
| rh_fusiform_area | -0,8351 | * 0,0194 |
| rh_fusiform_volume | -0,9446 | ** 0,0013 |
|  |  |  |  |
| GnRH | lh_bankssts_thickness | -0,8521 | * 0,0149 |
| lh_caudalanteriorcingulate_volume | -0,8072 | * 0,0282 |
| lh_entorhinal_thickness | -0,8864 | ** 0,0078 |
| lh_entorhinal_volume | -0,9399 | ** 0,0016 |
| lh_inferiortemporal_thickness | -0,9051 | ** 0,0051 |
| lh_insula_thickness | -0,8641 | * 0,0121 |
| lh_middletemporal_thickness | -0,85 | * 0,0154 |
| lh_parsorbitalis_thickness | -0,9232 | ** 0,003 |
| lh_parstriangularis_thickness | -0,9217 | ** 0,0032 |
| lh_superiortemporal_thickness | -0,8717 | * 0,0106 |
| lh_temporalpole_thickness | -0,7781 | * 0,0394 |
| rh_bankssts_thickness | -0,874 | * 0,0101 |
| rh_bankssts_volume | -0,8285 | * 0,0213 |
| rh_entorhinal_thickness | -0,8711 | * 0,0107 |
| rh_inferiorparietal_thickness | -0,8179 | * 0,0246 |
| rh_inferiortemporal_thickness | -0,9062 | ** 0,0049 |
| rh_insula_thickness | -0,7956 | * 0,0324 |
| rh_MeanThickness_thickness | -0,7962 | * 0,0322 |
| rh_middletemporal_thickness | -0,9399 | ** 0,0016 |
| rh_middletemporal_volume | -0,9099 | ** 0,0045 |
| rh_postcentral_thickness | -0,7592 | * 0,0478 |
| rh_rostralanteriorcingulate_area | -0,8046 | * 0,0291 |
| rh_superiortemporal_thickness | -0,793 | * 0,0334 |
| right_presubiculum | -0,873 | * 0,0103 |
| right_subiculum | -0,8899 | ** 0,0073 |
|  |  |  |  |
| IL-6 | lh_entorhinal_thickness | -0,8899 | * 0,0175 |
| lh_precentral_area | 0,8743 | * 0,0227 |
| lh_superiortemporal_thickness | -0,834 | * 0,039 |
| lh_temporalpole_area | 0,8324 | * 0,0398 |
| lh_temporalpole_thickness | -0,8399 | * 0,0364 |
| rh_bankssts_thickness | -0,8902 | * 0,0174 |
| rh_entorhinal_area | 0,9651 | ** 0,0018 |
| rh_entorhinal_thickness | -0,813 | * 0,0492 |
| rh_inferiortemporal_thickness | -0,9106 | * 0,0116 |
| rh_insula_thickness | -0,9384 | ** 0,0056 |
| rh_middletemporal_thickness | -0,9593 | ** 0,0024 |
| rh_middletemporal_volume | -0,8252 | * 0,0432 |
| rh_superiortemporal_thickness | -0,8487 | * 0,0326 |
| rh_temporalpole_area | 0,9416 | ** 0,005 |
| rh_temporalpole_thickness | -0,9654 | ** 0,0018 |
| right_subiculum | -0,8142 | * 0,0486 |
|  |  |  |  |
| IL-18 | lh_cuneus_area | 0,8029 | * 0,0297 |
| lh_entorhinal_thickness | -0,7778 | * 0,0395 |
| lh_middletemporal_thickness | -0,775 | * 0,0407 |
| lh_pericalcarine_area | 0,9051 | ** 0,0051 |
| lh_superiortemporal_thickness | -0,7574 | * 0,0486 |
| rh_bankssts_thickness | -0,9043 | ** 0,0052 |
| rh_bankssts_volume | -0,7975 | * 0,0317 |
| rh_inferiortemporal_thickness | -0,9074 | ** 0,0048 |
| rh_inferiortemporal_volume | -0,7878 | * 0,0354 |
| rh_lateraloccipital_area | 0,7646 | * 0,0453 |
| rh_middletemporal_thickness | -0,8883 | ** 0,0075 |
| rh_middletemporal_volume | -0,86 | * 0,0131 |
| right_presubiculum | -0,8125 | * 0,0263 |
|  |  |  |  |
| Jag1 | lh_entorhinal_thickness | -0,834 | * 0,0197 |
| lh_rostralmiddlefrontal_area | 0,7661 | * 0,0446 |
| rh_entorhinal_area | 0,925 | ** 0,0028 |
| rh_insula_thickness | -0,8816 | ** 0,0087 |
| rh_middletemporal_thickness | -0,7831 | * 0,0373 |
| rh_superiortemporal_thickness | -0,7744 | * 0,0409 |
| rh_temporalpole_area | 0,9023 | ** 0,0054 |
| rh_temporalpole_thickness | -0,9062 | ** 0,0049 |
|  |  |  |  |
| Leptin | left_presubiculum | -0,8145 | * 0,0257 |
| right_presubiculum | -0,7872 | * 0,0356 |
| lh_bankssts_thickness | -0,8522 | * 0,0149 |
| lh_caudalmiddlefrontal_thickness | -0,9411 | ** 0,0016 |
| lh_fusiform_thickness | -0,7981 | * 0,0314 |
| lh_inferiorparietal_thickness | -0,8329 | * 0,02 |
| rh_inferiorparietal_thickness | -0,8026 | * 0,0298 |
| lh_inferiortemporal_thickness | -0,7556 | * 0,0495 |
| lh_middletemporal_thickness | -0,8189 | * 0,0243 |
| lh_parstriangularis_thickness | -0,764 | * 0,0456 |
| lh_rostralmiddlefrontal_thickness | -0,7942 | * 0,0329 |
| lh_supramarginal_thickness | -0,7617 | * 0,0466 |
| lh_frontalpole_thickness | -0,9007 | ** 0,0057 |
| rh_frontalpole_thickness | -0,7578 | * 0,0484 |
| lh_insula_thickness | -0,7792 | * 0,0389 |
| lh_MeanThickness_thickness | -0,7837 | * 0,037 |
| lh_bankssts_volume | -0,8259 | * 0,0221 |
| rh_bankssts_volume | -0,7556 | * 0,0494 |
| lh_inferiortemporal_volume | -0,7974 | * 0,0317 |

|  | Plasma measures vs RMN measures | | |
| --- | --- | --- | --- |
|  |  | **Pearson r** | **P value** |
| CTACK | lh_medialorbitofrontal_area | 0,8021 | * 0,03 |
| lh_posteriorcingulate_volume | 0,7544 | ns 0,0501 |
| lh_precentral_area | 0,7587 | * 0,048 |
| rh_entorhinal_area | 0,7711 | * 0,0424 |
|  |  |  |  |
| FGF-21 | lh_cuneus_volume | -0,7616 | * 0,0466 |
| lh_lateraloccipital_volume | -0,8047 | * 0,0291 |
| lh_lingual_area | -0,8624 | * 0,0125 |
| lh_lingual_volume | -0,9326 | ** 0,0022 |
| lh_parsopercularis_thickness | -0,8567 | * 0,0138 |
| lh_precuneus_thickness | -0,8844 | ** 0,0082 |
| lh_precuneus_volume | -0,7823 | * 0,0376 |
| lh_superiorfrontal_thickness | -0,8031 | * 0,0296 |
| rh_cuneus_volume | -0,8206 | * 0,0237 |
| rh_lingual_volume | -0,8155 | * 0,0254 |
| rh_paracentral_thickness | -0,8036 | * 0,0294 |
| rh_parsopercularis_thickness | -0,8545 | * 0,0143 |
| rh_precentral_thickness | -0,8315 | * 0,0204 |
|  |  |  |  |
| GDF-15 | lh_entorhinal_area | 0,8893 | ** 0,0074 |
| lh_lingual_thickness | -0,7579 | * 0,0484 |
| lh_medialorbitofrontal_area | 0,7953 | * 0,0325 |
| lh_pericalcarine_thickness | -0,8678 | * 0,0114 |
| lh_temporalpole_thickness | -0,8626 | * 0,0125 |
| rh_entorhinal_area | 0,7603 | * 0,0472 |
| rh_fusiform_thickness | -0,8174 | * 0,0247 |
| rh_insula_thickness | -0,8961 | ** 0,0063 |
| rh_lateraloccipital_thickness | -0,909 | ** 0,0046 |
| rh_lateralorbitofrontal_thickness | -0,8018 | * 0,0301 |
| rh_MeanThickness_thickness | -0,7691 | * 0,0432 |
| rh_parahippocampal_thickness | -0,8779 | ** 0,0094 |
| rh_superiortemporal_thickness | -0,858 | * 0,0135 |
| rh_temporalpole_area | 0,8351 | * 0,0194 |
| rh_temporalpole_thickness | -0,8576 | * 0,0136 |
| right_CA3 | -0,7891 | * 0,0349 |
| right_CA4 | -0,7564 | * 0,0491 |
| right_GC-ML-DG | -0,7561 | * 0,0492 |
| right_molecular_layer_HP | -0,7637 | * 0,0457 |
|  |  |  |  |
| IL-6 | lh_isthmuscingulate_area | 0,8755 | * 0,0223 |
| lh_posteriorcingulate_thickness | -0,9402 | ** 0,0053 |
| Medulla | 0,8317 | * 0,0401 |
| Midbrain | 0,8343 | * 0,0389 |
| rh_isthmuscingulate_area | 0,8249 | * 0,0433 |
| rh_lateralorbitofrontal_area | 0,8364 | * 0,038 |
| rh_parsorbitalis_area | 0,902 | * 0,0139 |
| rh_rostralanteriorcingulate_area | 0,8705 | * 0,0241 |
|  |  |  |  |
| IL-10 | lh_parahippocampal_area | -0,8547 | * 0,0301 |
| lh_parahippocampal_thickness | -0,8339 | * 0,0391 |
| lh_parahippocampal_volume | -0,9733 | * 0,0011 |
| rh_caudalmiddlefrontal_volume | -0,8419 | * 0,0355 |
| rh_transversetemporal_area | -0,8274 | * 0,0421 |
|  |  |  |  |
| IL-18 | lh_caudalanteriorcingulate_area | 0,7916 | * 0,0339 |
| lh_frontalpole_thickness | 0,8329 | * 0,02 |
| lh_inferiortemporal_volume | 0,7939 | * 0,033 |
| lh_middletemporal_thickness | 0,7959 | * 0,0323 |
| lh_middletemporal_volume | 0,7786 | * 0,0392 |
| lh_parstriangularis_thickness | 0,7925 | * 0,0336 |
| lh_pericalcarine_area | -0,9226 | ** 0,0031 |
| lh_pericalcarine_volume | -0,8209 | * 0,0236 |
| rh_bankssts_area | 0,7662 | * 0,0446 |
| rh_bankssts_volume | 0,848 | * 0,0159 |
| rh_inferiortemporal_thickness | 0,8045 | * 0,0291 |
| rh_inferiortemporal_volume | 0,8164 | * 0,0251 |
| rh_middletemporal_volume | 0,8253 | * 0,0222 |
| rh_rostralanteriorcingulate_area | 0,7944 | * 0,0329 |
| right_parasubiculum | 0,8204 | * 0,0238 |
| right_presubiculum | 0,7984 | * 0,0313 |
|  |  |  |  |
| Leptin | left_fimbria | -0,9307 | ** 0,0023 |
| left_GC-ML-DG | -0,7805 | * 0,0384 |
| lh_caudalanteriorcingulate_volume | -0,7793 | * 0,0389 |
| lh_cuneus_thickness | -0,8685 | * 0,0112 |
| lh_insula_thickness | -0,8671 | * 0,0115 |
| lh_parsorbitalis_thickness | -0,7795 | * 0,0388 |
| lh_postcentral_thickness | -0,8289 | * 0,0211 |
| lh_superiortemporal_thickness | -0,7903 | * 0,0344 |
| lh_temporalpole_thickness | -0,7974 | * 0,0317 |
| lh_transversetemporal_thickness | -0,8123 | * 0,0264 |
| rh_entorhinal_thickness | -0,7667 | * 0,0443 |
| rh_insula_thickness | -0,7722 | * 0,0419 |
| rh_MeanThickness_thickness | -0,8199 | * 0,0239 |
| rh_medialorbitofrontal_thickness | -0,9548 | *** 0,0008 |
| rh_middletemporal_thickness | -0,7581 | * 0,0483 |
| rh_paracentral_volume | -0,7846 | * 0,0367 |
| rh_parsorbitalis_thickness | -0,8262 | * 0,022 |
| rh_postcentral_thickness | -0,8661 | * 0,0117 |
| rh_rostralmiddlefrontal_thickness | -0,8181 | * 0,0245 |
| rh_superiortemporal_thickness | -0,7806 | * 0,0383 |
| rh_supramarginal_thickness | -0,7647 | * 0,0452 |
| right_CA3 | -0,779 | * 0,039 |
| right_CA4 | -0,8259 | * 0,0221 |
| right_fimbria | -0,8103 | * 0,0271 |
| right_GC-ML-DG | -0,8412 | * 0,0177 |
| right_Whole_hippocampus | -0,767 | * 0,0442 |

|  | nEVs measures vs RMN Models | | |
| --- | --- | --- | --- |
|  |  | **Pearson r** | **P value** |
| GDF-15 | mta_left_model_1 | 0,8529 | * 0,0147 |
| mta_left_model_3 | 0,8128 | * 0,0262 |
|  |  |  |  |
| IL-6 | gca-f_model_1 | 0,8561 | * 0,0296 |
| mta_right_mean | 0,9162 | * 0,0102 |
| mta_right_median | 0,8995 | * 0,0146 |
| mta_right_model_1 | 0,9257 | ** 0,0081 |
| mta_right_model_2 | 0,8569 | * 0,0292 |
| mta_right_model_3 | 0,9321 | ** 0,0068 |
| mta_right_model_4 | 0,9545 | ** 0,0031 |
| mta_right_model_5 | 0,8593 | * 0,0283 |
| pa_mean | 0,8759 | * 0,0221 |
| pa_median | 0,8238 | * 0,0438 |
| pa_model_3 | 0,9122 | * 0,0112 |
| pa_model_4 | 0,8882 | * 0,0181 |
| SCP | 0,95 | ** 0,0037 |
|  |  |  |  |
| IL-10 | mta_left_std | 0,7884 | * 0,0352 |
|  |  |  |  |
| Jag1 | mta_right_mean | 0,8341 | * 0,0197 |
| mta_right_median | 0,8116 | * 0,0266 |
| mta_right_model_1 | 0,8504 | * 0,0153 |
| mta_right_model_2 | 0,7583 | * 0,0482 |
| mta_right_model_3 | 0,8527 | * 0,0148 |
| mta_right_model_4 | 0,9097 | ** 0,0045 |
| pa_model_3 | 0,9581 | *** 0,0007 |
| SCP | 0,9292 | ** 0,0025 |
|  |  |  |  |
| Leptin | mta_left_std | 0,7949 | * 0,0327 |
| pa_model_1 | -0,7851 | * 0,0365 |

|  | Plasma measures vs RMN Models | | |
| --- | --- | --- | --- |
|  |  | **Pearson r** | **P value** |
| CTACK | pa_mean | 0,8815 | ** 0,0087 |
| pa_median | 0,8055 | * 0,0288 |
| pa_model_4 | 0,862 | * 0,0126 |
| pa_model_5 | 0,8128 | * 0,0262 |
|  |  |  |  |
| FGF-21 | gca-f_mean | 0,791 | * 0,0342 |
| gca-f_model_2 | 0,8527 | * 0,0147 |
| gca-f_model_3 | 0,9092 | ** 0,0045 |
| gca-f_model_5 | 0,7867 | * 0,0358 |
| left_HATA | -0,8917 | ** 0,007 |
| mta_left_model_2 | 0,7576 | * 0,0485 |
| mta_right_std | 0,789 | * 0,0349 |
|  |  |  |  |
| GDF-15 | gca-f_model_1 | 0,8272 | * 0,0217 |
| gca-f_model_4 | 0,7563 | * 0,0491 |
| mta_left_model_2 | 0,7765 | * 0,04 |
| mta_right_median | 0,8649 | * 0,012 |
| mta_right_model_5 | 0,8519 | * 0,0149 |
| SCP | 0,8038 | * 0,0294 |
|  |  |  |  |
| IL-18 | pa_model_1 | 0,8526 | * 0,0148 |
